# Supplementary material for: Inducible microRNA-200c decreases motility of breast cancer cells and reduces filamin A
Source: PubMed Central journal article supplement (PMC6867627; doi:10.1371/journal.pone.0224314), 2019-11-20
Supplement: pone.0224314.s004.pdf [file pone.0224314.s004.pdf]

# S1 Fig . Effect of miR-200c expression on FLNA in BT549 cells

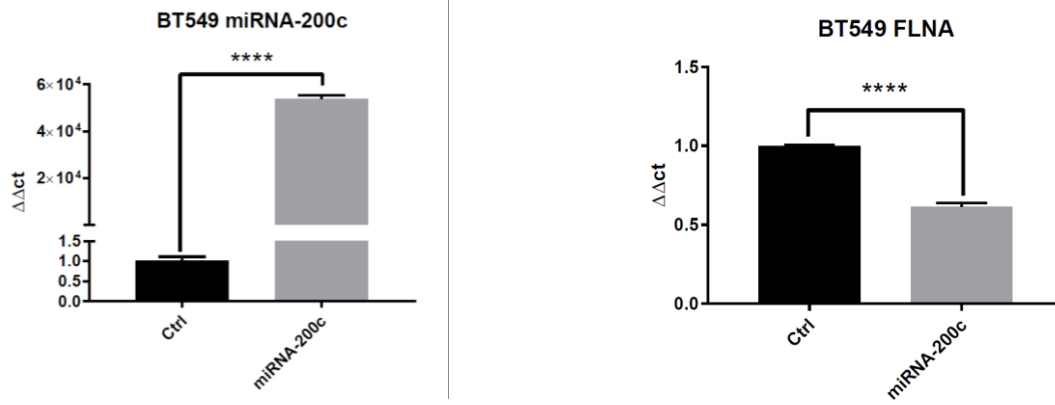

BT549 cells were transfected with 75 pmol of either miR-200c mimic or scrambled siRNA-Control (Dharmacon). After 72 hours cells were harvested for RNA lysis with subsequent qPCR analysis. Two-sided t-test, \*\*\*\*:  $p \leq 0.0001$
