# Supplementary material for: Inducible microRNA-200c decreases motility of breast cancer cells and reduces filamin A
Source: PubMed Central journal article supplement (PMC6867627; doi:10.1371/journal.pone.0224314), 2019-11-20
Supplement: pone.0224314.s005.pdf [file pone.0224314.s005.pdf]

## S2 Fig . Effect of miR-200c expression on mRNA levels of a set of transcription factors A

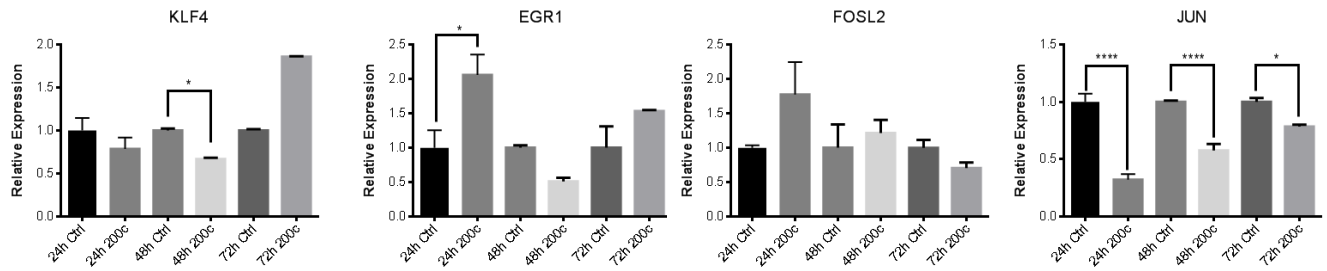

Analysis of different potential transcription factors for FLNA was performed after miR-200c induction. The graphs show the RT-qPCR results at different time points, with no consistent effect for any factor but JUN. \*:  $p \leq 0.05$  ; \*\*\*\*:  $p \leq 0.0001$
